# Supplementary material for: Experimental Investigation of the Hydrodynamic Characteristics of Longline Aquaculture Facilities under Current and Wave Conditions
Source: MDPI journal article supplement (doi:10.3390/fishes8040204), 2023-04-15
Supplement: s1 [file s1]

Supplementary Materials

# Experimental Investigation of the Hydrodynamic Characteristics of Longline Aquaculture Facilities under Current and Wave Conditions

Xinxin Wang <sup>†</sup>, Junyi Xie <sup>†</sup>, Yan Luo, Xiao Wang, Gaobo Guo and Xinxing You <sup>\*</sup>

College of Fisheries, Ocean University of China, Qingdao 266003, China; wxinxin@ouc.edu.cn (Xinxin Wang); xjy3705@stu.ouc.edu.cn (J.X.); ggb@stu.ouc.edu.cn (G.G.)

<sup>\*</sup> Correspondence: youxinxing@ouc.edu.cn

<sup>†</sup> These authors contributed equally to this work.

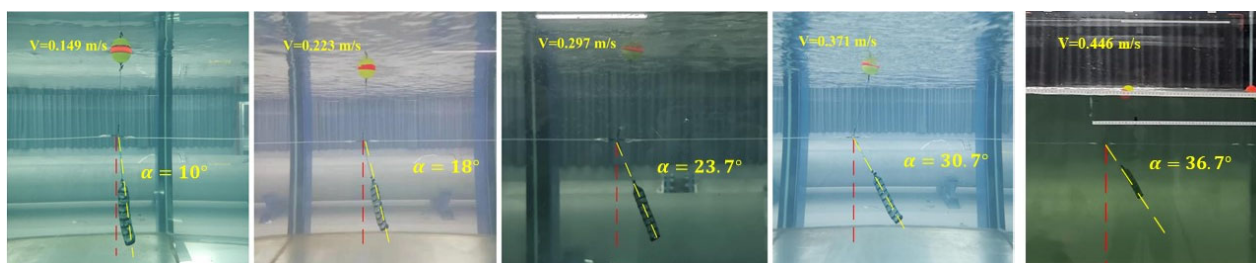

**Figure S1.** Inclined angle between the oyster cage and the flow direction in the currents from 0.15 to 0.45 m/s.
